# Supplementary material for: Interface modification of hole transport layers in tin-based halide perovskite solar cells
Source: Royal Society of Chemistry journal article supplement (doi:10.1039/d5cp00552c), 2025-01-01

# Interface modification of hole transport layer in tin-based halide perovskite solar cells

Xin Zhang <sup>a,b</sup>, Xinyao Chen <sup>c</sup>, Zhenjun Li <sup>d</sup>, Jin Cheng <sup>b</sup>, Chunqian Zhang <sup>b</sup> and Junming Li <sup>b\*</sup>

<sup>a</sup> Key Laboratory of Modern Measurement & Control Technology, Ministry of Education, Beijing Information Science and Technology University, Beijing 100192, China

<sup>b</sup> Beijing Key Laboratory for Sensor, School of Science, Beijing Information Science and Technology University, Beijing 100101, China

<sup>c</sup> Key Laboratory of the Ministry of Education for Optoelectronic Measurement Technology and Instrument, Beijing Information Science and Technology University, Beijing 100192, China

<sup>d</sup> CAS Key Laboratory of Standardization and Measurement for Nanotechnology, CAS Key Laboratory of Nanophotonic Materials and Devices (Preparatory), National Center for Nanoscience and Technology, Beijing 100190, China

\* Correspondence: [li@bistu.edu.cn](mailto:li@bistu.edu.cn);

**Note S1.** The current density-voltage characteristics of PEDOT:PSS film as an active layer (ITO/SAM/PDEOT:PSS/Cu).

The HTL layer is approximately 40 nm thick and has an effective area of 0.05 cm<sup>2</sup>. The control, MeO-2PACz, and Me-4PACz exhibited conductivities of 0.06967 S, 0.10784 S, and 0.12939 S, respectively. The calculated values were  $0.55736 \times 10^{-2}$  mS cm<sup>-1</sup>,  $0.86272 \times 10^{-2}$  mS cm<sup>-1</sup>, and  $1.03512 \times 10^{-2}$  mS cm<sup>-1</sup>, respectively, using the equation.

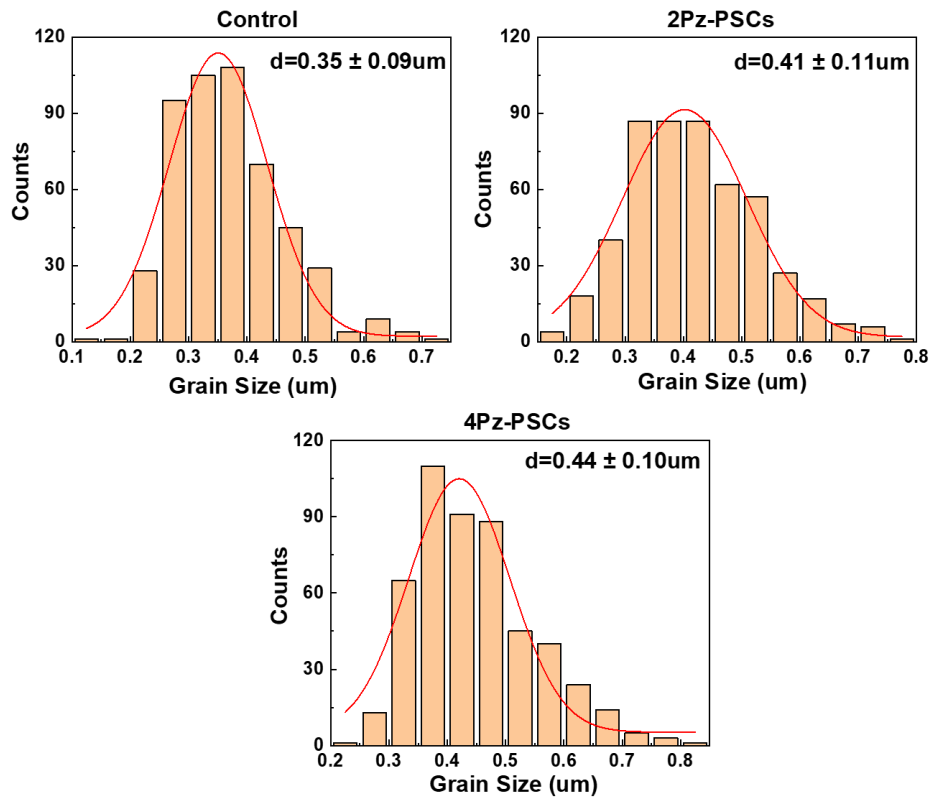

**Figure S1.** Size distribution histogram determined from top-view SEM image.

**Table S1.** The information of Sn XPS measurement deconvoluted into Sn<sup>2+</sup> and Sn<sup>4+</sup> peaks for control, 2Pz and 4Pz perovskite thin layers.

| Sample   | Ionic            | Peak index           | BE (ev) | FWHM (ev) | Percentage (%) | Relative ratio (Sn <sup>4+</sup> /Sn <sup>2+</sup> ) [%] |
|----------|------------------|----------------------|---------|-----------|----------------|----------------------------------------------------------|
| Control  | Sn <sup>2+</sup> | Sn 3d <sub>5/2</sub> | 486.00  | 1.17      | 32.66          | 45.0                                                     |
|          |                  | Sn 3d <sub>3/2</sub> | 494.41  | 1.17      | 32.87          |                                                          |
|          | Sn <sup>4+</sup> | Sn 3d <sub>5/2</sub> | 486.77  | 1.16      | 17.22          |                                                          |
|          |                  | Sn 3d <sub>3/2</sub> | 495.19  | 1.16      | 17.25          |                                                          |
| 2Pz/PVSK | Sn <sup>2+</sup> | Sn 3d <sub>5/2</sub> | 486.06  | 1.18      | 34.59          | 44.1                                                     |
|          |                  | Sn 3d <sub>3/2</sub> | 494.48  | 1.18      | 34.82          |                                                          |
|          | Sn <sup>4+</sup> | Sn 3d <sub>5/2</sub> | 486.81  | 0.98      | 15.25          |                                                          |
|          |                  | Sn 3d <sub>3/2</sub> | 495.22  | 0.98      | 15.34          |                                                          |
| 4Pz/PVSK | Sn <sup>2+</sup> | Sn 3d <sub>5/2</sub> | 486.07  | 1.19      | 37.70          | 32.2                                                     |
|          |                  | Sn 3d <sub>3/2</sub> | 494.48  | 1.19      | 37.92          |                                                          |
|          | Sn <sup>4+</sup> | Sn 3d <sub>5/2</sub> | 486.84  | 0.98      | 12.15          |                                                          |
|          |                  | Sn 3d <sub>3/2</sub> | 495.26  | 0.98      | 12.23          |                                                          |

**Table S2.** Fitted PL lifetimes of control and SAM-modified Sn-based perovskite films on glass substrates.  $A_1$  and  $A_2$  are fractional intensities, and  $\tau_1$  and  $\tau_2$  are lifetimes. The average carrier lifetime ( $\tau_{ave}$ ) was calculated with  $\tau_{ave} = A_1*\tau_1+A_2*\tau_2$ .

|          | $A_1(\%)$ | $\tau_1$ (ns) | $A_2(\%)$ | $\tau_2$ (ns) | $\tau_{ave}$ (ns) |
|----------|-----------|---------------|-----------|---------------|-------------------|
| Control  | 1.52      | 0.50          | 0.06      | 3.94          | 1.0               |
| 2Pz/PVSK | 0.99      | 1.65          | 0.07      | 4.78          | 2.0               |
| 4Pz/PVSK | 1.05      | 1.67          | 0.02      | 16.46         | 2.1               |

**Figure S2.** Champion device optical current density-voltage forward and reverse sweep curves.

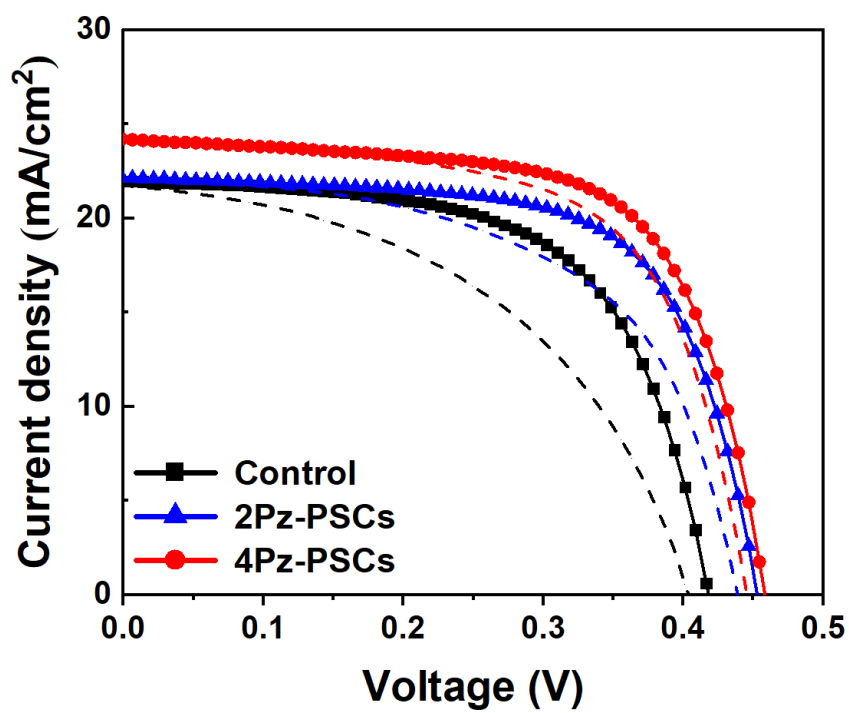

**Table S3.** Data were obtained from the EIS fitting circuit.

$$\tau = RC$$

| Sample   | $R_{\text{rec}}$<br>( $\Omega$ ) | C<br>(F)             | $\tau$<br>( $\mu\text{s}$ ) |
|----------|----------------------------------|----------------------|-----------------------------|
| Control  | 11747                            | $7.238\text{E}^{-9}$ | 85.018                      |
| 2Pz-PSCs | 16975                            | $6.612\text{E}^{-9}$ | 112.243                     |
| 4Pz-PSCs | 18483                            | $7.292\text{E}^{-9}$ | 134.778                     |

**Figure S3.** DLTS spectra of (a) control devices, (b) 2Pz-PSCs, and (c) 4Pz-PSCs.

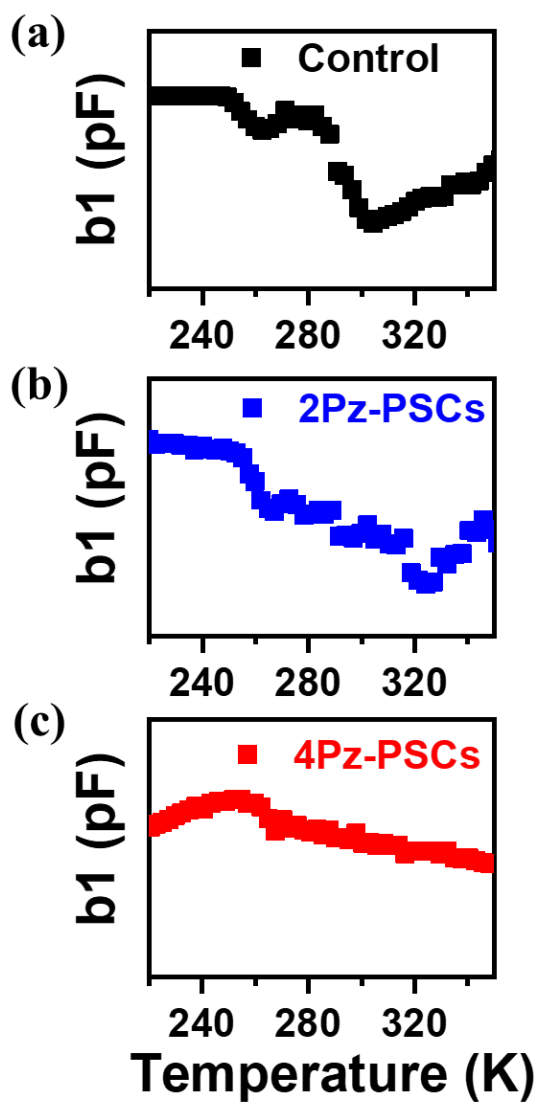

Supplement: d5cp00552c1.pdf [file d5cp00552c1.pdf]
